# Supplementary material
Source: publisher site journal article supplement (https://www.dovepress.com/article/561592)
Supplement: Supplementary file 1 [file 561592_Supplementary%20file_1.docx]

| 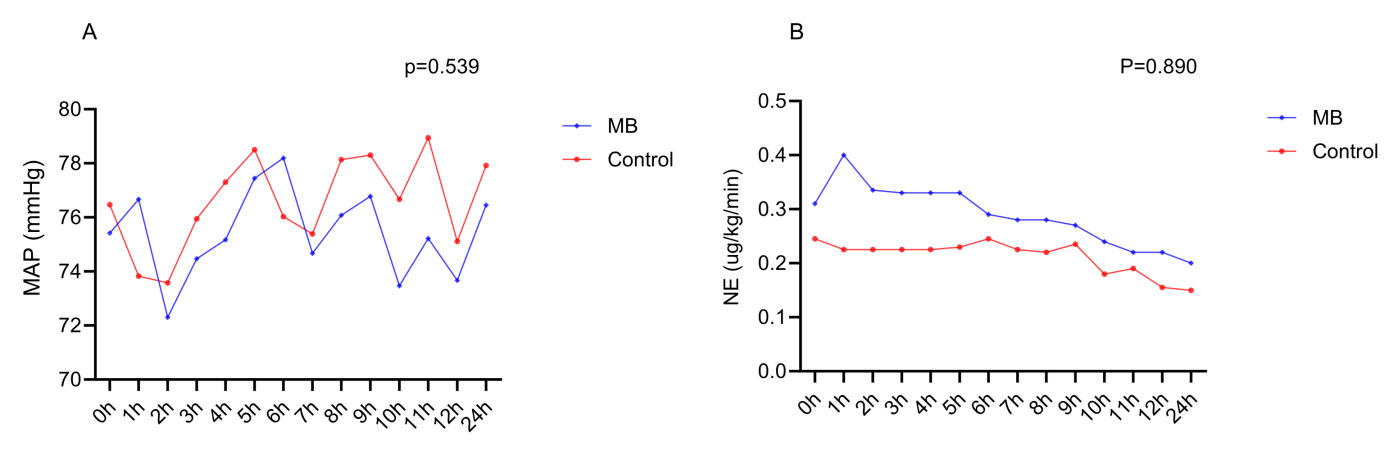 |  |
| --- | --- |
| **Supplementary Figure 1** Changes in MAP and NE levels in two groups over 24 hours. (A) MAP (mmHg): No significant difference in MAP was observed between the MB group and the control group (P=0.539) at each time point (0h, 1h, 2h, …, 24h). (B) NE (ug/kg/min): There was no significant difference in NE level between the MB group and the control group (P=0.890) at each time point (0h, 1h, 2h, …, 24h). Inter-group P-values were derived from mixed linear models (consistent with the statistical approach in the main text), and no significant differences were identified at each time point (P > 0.05). | |

| 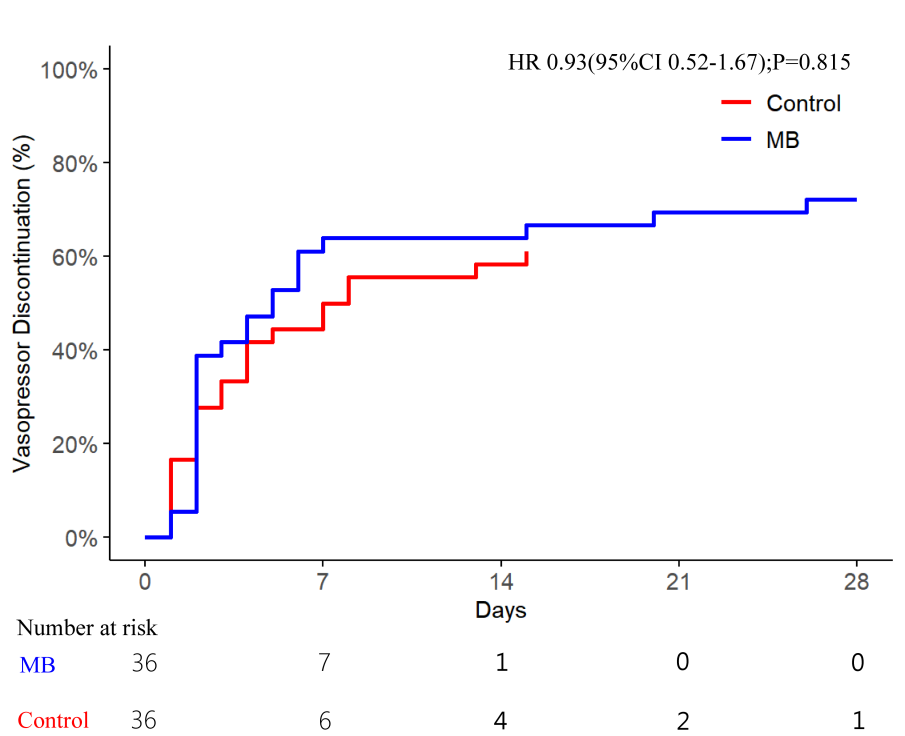 |
| --- |
| **Supplementary Figure 2** Kaplan–Meier plot of the cumulative incidence of vasopressor discontinuation. Adjusted hazard ratio with death as a competing risk analysis. Vasopressor discontinuation rates over 28 days in the MB group (blue curve) and control group (red curve). The hazard ratio (HR) for vasopressor discontinuation in the MB group versus the control group was 0.93 (95% confidence interval [CI] 0.52–1.67), with a corresponding P-value of 0.815, indicating no statistically significant difference between the two groups. The number at risk for each group at key time points (0, 7, 14, 21, 28 days) is presented below the plot: for the MB group, the numbers were 36, 7, 1, 0, 0; for the control group, the numbers were 36, 6, 4, 2, 1.  **Abbreviations:** HR, hazard ratio; CI, confidence interval. |


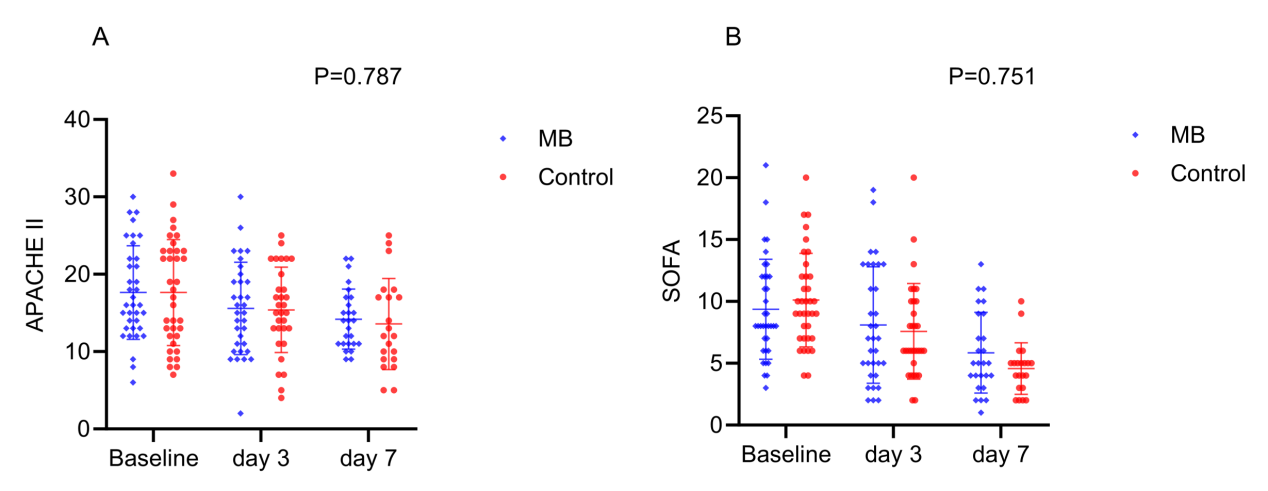


| **Supplementary Figure 3** Changes in APACHE II and SOFA scores in two groups over 7 days. (A) APACHE II score: No significant difference in APACHE II score was observed between the MB group and the control group (P=0.787) at Baseline, day 3, and day 7.(B) SOFA score: There was no significant difference in SOFA score between the MB group and the control group (P=0.751) at Baseline, day 3, and day 7. Inter-group P-values were derived from mixed linear models (consistent with the statistical approach in the main text), and no significant differences were identified at each time point (P > 0.05). |
| --- |

| 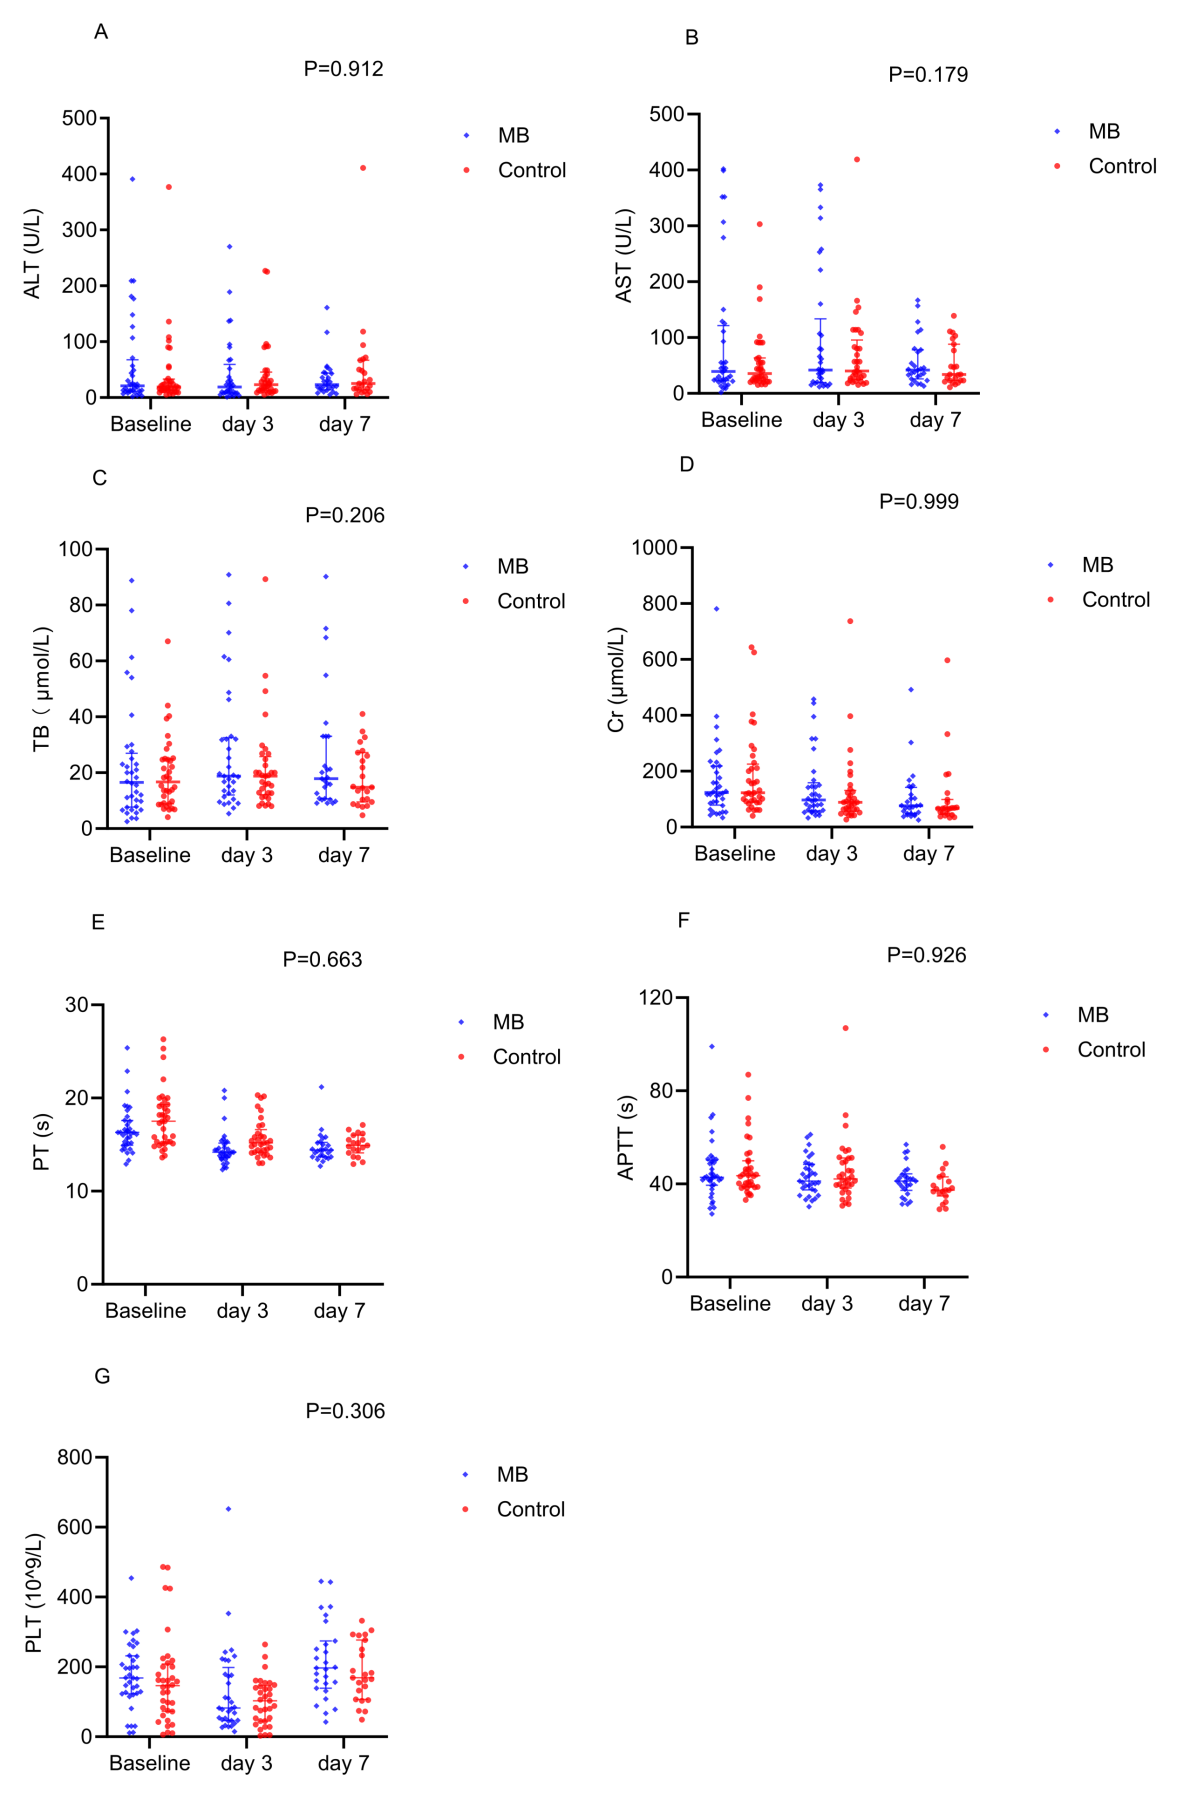 |  |
| --- | --- |
| **Supplementary Figure 4** Changes in organ function of two groups of participants over 7 days. (A) Alanine Aminotransferase (ALT): No significant difference in ALT was observed between the MB group and the control group (P=0.912) at Baseline, day 3, and day 7.(B) Aspartate Aminotransferase (AST): No significant difference in AST was observed between the MB group and the control group (P=0.179) at Baseline, day 3, and day 7.(C) Total Bilirubin (TB): No significant difference in TB was observed between the MB group and the control group (P=0.206) at Baseline, day 3, and day 7.(D) Creatinine (Cr): No significant difference in Cr was observed between the MB group and the control group (P=0.999) at Baseline, day 3, and day 7.(E) Prothrombin Time (PT): No significant difference in PT was observed between the MB group and the control group (P=0.663) at Baseline, day 3, and day 7.(F) Activated Partial Thromboplastin Time (APTT): No significant difference in APTT was observed between the MB group and the control group (P=0.926) at Baseline, day 3, and day 7.(G) Platelet Count (PLT): No significant difference in PLT was observed between the MB group and the control group (P=0.306) at Baseline, day 3, and day 7.Inter-group P-values were derived from mixed linear models (consistent with the statistical approach in the main text), and no significant differences were identified at each time point (P > 0.05). | |

| 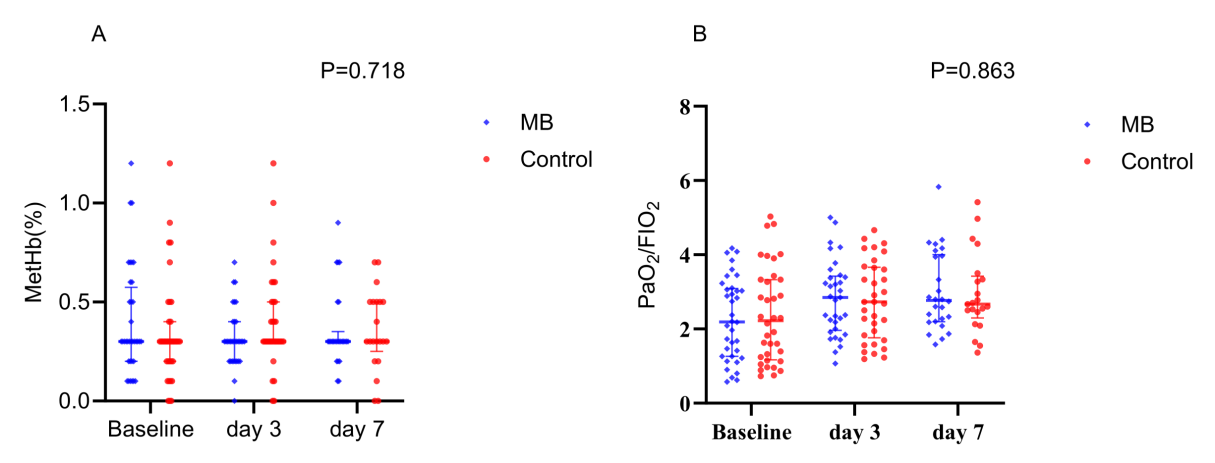 |  |
| --- | --- |
| **Supplementary Figure 5** Changes in Methemoglobin (MethHb) and Oxygenation Index (PaO2/FiO2) in two groups over 7 days. (A) Methemoglobin (MethHb): No significant difference in MethHb was observed between the MB group and the control group (P=0.718) at Baseline, day 3, and day 7.(B) Oxygenation Index (PaO2/FiO2): No significant difference in PaO2/FiO2 was observed between the MB group and the control group (P=0.863) at Baseline, day 3, and day 7.Inter-group P-values were derived from mixed linear models (consistent with the statistical approach in the main text), and no significant differences were identified at each time point (P > 0.05). | |
